# Supplementary material for: FoxH1 represses miR-430 during early embryonic development of zebrafish via non-canonical regulation
Source: BMC Biol. 2019 Jul 30;17:61. doi: 10.1186/s12915-019-0683-z (PMC6664792; doi:10.1186/s12915-019-0683-z)
Supplement: Supplementary file 5 — Individual qPCR values. (XLSX 90 kb) [file 12915_2019_683_MOESM5_ESM.xlsx]

## Sheet: Fig. 2B
	Fig. 2B:
	Target	Sample	Cq	Mean Cq	Expession	Expression SEM
	mature miR-430a	wild type 4hpf	22.11	21.84	1	0.22471
			21.57
		MZsur 4hpf	21.66	21.68	1.15371	0.10131
			21.69
		wild type 5hpf	21.6	21.49	1	0.07732
			21.38
		MZsur 5hpf	21.86	21.96	0.91186	0.10167
			22.05
		wild type 7hpf	20.92	20.65	1	0.27433
			20.37
		MZsur 7hpf	20.66	20.66	1.2436	0.04188
			20.65
		wild type 9hpf	21.41	21.38	1	0.05299
			21.34
		MZsur 9hpf	21.43	21.41	2.00473	0.07145
			21.39
	mature miR-430b	wild type 4hpf	22.92	22.83	1	0.1395
			22.74
		MZsur 4hpf	22.7	22.79	1.06326	0.11213
			22.87
		wild type 5hpf	23.27	23.25	1	0.01682
			23.23
		MZsur 5hpf	23.06	23.12	1.37421	0.13364
			23.18
		wild type 7hpf	22.12	21.94	1	0.23309
			21.75
		MZsur 7hpf	21.55	21.59	1.59703	0.068
			21.62
		wild type 9hpf	23.1	23.16	1	0.06186
			23.22
		MZsur 9hpf	23.19	23.24	1.94854	0.0952
			23.29
	mature miR-430c	wild type 4hpf	20.52	20.38	1	0.15689
			20.24
		MZsur 4hpf	20.14	20	1.34025	0.17272
			19.86
		wild type 5hpf	20.46	20.46	1	0.01053
			20.45
		MZsur 5hpf	20.04	20.07	1.64805	0.14784
			20.09
		wild type 7hpf	18.18	18.03	1	0.22215
			17.87
		MZsur 7hpf	18.02	18.11	1.18876	0.0815
			18.19
		wild type 9hpf	20.06	20.22	1	0.12285
			20.38
		MZsur 9hpf	20.65	20.51	1.67975	0.17392
			20.37
	mature miR-103	wild type 4hpf	32.4	32.22	N/A	N/A
			32.04
		MZsur 4hpf	32.39	32.27	N/A	N/A
			32.14
		wild type 5hpf	32.27	32.29	N/A	N/A
			32.3
		MZsur 5hpf	32.74	32.61	N/A	N/A
			32.48
		wild type 7hpf	30.58	30.87	N/A	N/A
			31.15
		MZsur 7hpf	31.24	31.19	N/A	N/A
			31.14
		wild type 9hpf	31.46	31.4	N/A	N/A
			31.33
		MZsur 9hpf	32.48	32.44	N/A	N/A
			32.39
	All calculations were automatically made by the Bio-Rad CFX Manager 3.1 software using mature miR-103 for sample normalisation

## Sheet: Fig. 2C
	Fig. 2C:
	Target	Sample	Cq	Mean Cq	Expession	Expression SEM
	pri-miR-430a	wild type	21.78	21.88	1	0.44545
			22.71
			21.14
		wild type + foxH1WT	21.3	21.19	0.9561	0.11246
			20.97
			21.29
		MZsur	19.33	19.13	3.2494	0.10586
			18.84
			19.23
		MZsur + foxH1WT	19.43	19.44	2.36407	0.03776
			19.53
			19.35
	pri-miR-430b	wild type	22.12	22.13	1	0.4773
			23.04
			21.23
		wild type + foxH1WT	21.54	21.56	0.87942	0.10228
			21.39
			21.75
		MZsur	19.19	19.48	3.0392	0.14478
			19.63
			19.61
		MZsur + foxH1WT	19.89	19.83	2.15057	0.06691
			20.01
			19.59
	pri-miR-430c	wild type	19.9	19.87	1	0.4384
			20.65
			19.06
		wild type + foxH1WT	19.64	19.31	0.89602	0.12355
			18.96
			19.32
		MZsur	17.36	17.35	2.8247	0.10706
			17.28
			17.4
		MZsur + foxH1WT	18.26	18.12	1.4939	0.03961
			18.21
			17.9
	ef1a	wild type	17.46	17.47	N/A	N/A
			18.25
			16.69
		wild type + foxH1WT	16.87	16.7	N/A	N/A
			16.44
			16.8
		MZsur	16.61	16.41	N/A	N/A
			16.12
			16.51
		MZsur + foxH1WT	16.25	16.26	N/A	N/A
			16.35
			16.17
	All calculations were automatically made by the Bio-Rad CFX Manager 3.1 software using ef1a for sample normalisation

## Sheet: Fig. 2D
	Fig. 2D:
	Target	Sample	Cq	Mean Cq	Expession	Expression SEM
	pri-miR-430a	wild type 5hpf	21.28	21.43	1	0.07898
			21.38
			21.64
		wild type 7hpf	28.42	28	1	0.34296
			28.55
			27.04
		MZsur 5hpf	20.25	20.37	4.70936	0.25954
			20.35
			20.5
		MZsur 7hpf	25.83	25.57	6.12632	0.80083
			25.39
			25.5
		MZoep 5hpf	21.08	20.93	1.43639	0.14047
			21.01
			20.69
		MZoep 7hpf	26.81	26.95	2.03574	0.18554
			26.56
			27.48
	pri-miR-430b	wild type 5hpf	21.52	21.59	1	0.04214
			21.67
			21.58
		wild type 7hpf	29.23	28.42	1	0.49947
			29.03
			27
		MZsur 5hpf	21	20.96	3.49049	0.10979
			20.97
			20.91
		MZsur 7hpf	26.17	26.24	5.17451	0.55662
			26.39
			26.15
		MZoep 5hpf	21.18	21.37	1.18723	0.11727
			21.32
			21.6
		MZoep 7hpf	25.26	26.23	2.52033	0.2297
			27.13
			26.29
	pri-miR-430c	wild type 5hpf	21	21.21	1	0.10726
			21.12
			21.5
		wild type 7hpf	28.25	27.59	1	0.40561
			28.08
			26.45
		MZsur 5hpf	19.93	20.16	4.65111	0.4013
			20.21
			20.33
		MZsur 7hpf	25.02	24.87	7.49543	0.81827
			24.85
			24.74
		MZoep 5hpf	20.74	20.53	1.62009	0.14508
			20.47
			20.39
		MZoep 7hpf	26.84	27.15	2.36551	0.21559
			27.05
			27.57
	ef1a	wild type 5hpf	19.6	19.57	N/A	N/A
			19.68
			19.42
		wild type 7hpf	17.72	17.6	N/A	N/A
			17.38
			17.69
		MZsur 5hpf	21.01	20.98	N/A	N/A
			21.04
			20.88
		MZsur 7hpf	17.53	17.78	N/A	N/A
			17.99
			17.83
		MZoep 5hpf	19.43	19.55	N/A	N/A
			19.71
			19.52
		MZoep 7hpf	17.49	17.56	N/A	N/A
			17.68
			17.52
	All calculations were automatically made by the Bio-Rad CFX Manager 3.1 software using ef1a for sample normalisation

## Sheet: Fig. 2E
	Fig. 2E:
	Target	Sample	Cq	Mean Cq	Expession	Expression SEM
	gsc	wild type 5hpf	26.58	26.37	1	0.09318
			26.19
			26.33
		MZsur 5hpf	27.28	27.18	0.48152	0.07523
			26.86
			27.41
		MZoep 5hpf	26.56	26.54	0.7072	0.04651
			26.49
			26.57
		wild type 7hpf	25.93	25.92	1	0.04846
			25.94
			25.9
		MZsur 7hpf	28.24	28.05	0.23797	0.05007
			27.56
			28.36
		MZoep 7hpf	29.91	30.43	0.04113	0.01144
			30.89
			30.48
		wild type 9hpf	25.53	25.49	1	0.33712
			26.05
			24.88
		MZsur 9hpf	27.62	27.59	0.23422	0.00647
			27.63
			27.52
		MZoep 9hpf	28.98	29.28	0.04511	0.01518
			29.94
			28.91
	ef1a	wild type 5hpf	19.3	19.18	N/A	N/A
			19.2
			19.05
		MZsur 5hpf	18.95	18.95	N/A	N/A
			18.68
			19.21
		MZoep 5hpf	19.04	18.87	N/A	N/A
			18.84
			18.72
		wild type 7hpf	17.82	17.69	N/A	N/A
			17.68
			17.58
		MZsur 7hpf	17.48	17.76	N/A	N/A
			17.71
			18.08
		MZoep 7hpf	17.81	17.6	N/A	N/A
			17.95
			17.04
		wild type 9hpf	17.31	17.23	N/A	N/A
			17.79
			16.58
		MZsur 9hpf	17.2	17.24	N/A	N/A
			17.25
			17.26
		MZoep 9hpf	16.38	16.55	N/A	N/A
			17.23
			16.03
	All calculations were automatically made by the Bio-Rad CFX Manager 3.1 software using ef1a for sample normalisation

## Sheet: Fig. 3A
	Fig. 3A:
	Target	Sample	Cq	Mean Cq	Expession	Expression SEM
	pri-miR-430a	wild type	18.53	18.68	1	0.04737
			18.82
			18.69
		wild type + FHD-VP16	17.8	17.75	2.21785	0.26815
			17.53
			17.92
		wild type + FHD-GFP	17.35	16.77	4.42188	1.02355
			16.3
			16.67
		wild type + FHD-EN	19.01	18.85	1.60551	0.26427
			18.68
			18.85
		MZsur	17.35	17.51	2.05744	0.10416
			17.52
			17.66
		MZsur + FHD-VP16	17.05	17.36	2.40502	0.32609
			17.39
			17.64
		MZsur + FHD-GFP	15.83	16.47	8.97486	2.78829
			16.72
			16.85
		MZsur + FHD-EN	17.87	17.84	1.93734	0.21261
			17.83
			17.82
	pri-miR-430b	wild type	17.67	18.29	1	0.06002
			17.57
			19.62
		wild type + FHD-VP16	17.45	17.6	1.88265	0.20028
			17.7
			17.66
		wild type + FHD-GFP	16.89	16.26	4.80221	1.14002
			15.96
			15.93
		wild type + FHD-EN	17.79	18.72	1.33203	0.21791
			19.59
			18.77
		MZsur	16.88	17.24	1.89926	0.07461
			16.97
			17.86
		MZsur + FHD-VP16	17.19	17.41	1.76168	0.19612
			17.63
			17.42
		MZsur + FHD-GFP	15.8	16.52	6.60455	2.31203
			17.17
			16.58
		MZsur + FHD-EN	17.61	17.6	1.74313	0.27244
			17.14
			18.05
	pri-miR-430c	wild type	18.41	18.16	1	0.09958
			17.96
			18.1
		wild type + FHD-VP16	17.21	17.23	2.22421	0.20597
			17.21
			17.27
		wild type + FHD-GFP	16.7	16.26	4.4054	0.78274
			16.01
			16.06
		wild type + FHD-EN	17.82	18.06	1.93433	0.30087
			18.15
			18.22
		MZsur	16.83	17.19	1.78894	0.08578
			16.95
			17.78
		MZsur + FHD-VP16	17.29	17.38	1.64848	0.12867
			17.48
			17.37
		MZsur + FHD-GFP	16.27	16.72	5.25708	1.40315
			16.92
			16.96
		MZsur + FHD-EN	17.45	17.6	1.58662	0.21425
			17.48
			17.87
	ef1a	wild type	19.45	19.4	N/A	N/A
			19.41
			19.34
		wild type + FHD-VP16	19.88	19.62	N/A	N/A
			19.51
			19.46
		wild type + FHD-GFP	19.83	19.63	N/A	N/A
			19.66
			19.39
		wild type + FHD-EN	22.08	20.24	N/A	N/A
			20.03
			18.62
		MZsur	19.26	19.26	N/A	N/A
			19.36
			19.15
		MZsur + FHD-VP16	19.46	19.33	N/A	N/A
			19.14
			19.4
		MZsur + FHD-GFP	19.81	20.35	N/A	N/A
			20.35
			20.9
		MZsur + FHD-EN	19.92	19.5	N/A	N/A
			19.27
			19.29
	All calculations were automatically made by the Bio-Rad CFX Manager 3.1 software using ef1a for sample normalisation

## Sheet: Fig. 3B
	Fig. 3B:
	Target	Sample	Cq	Mean Cq	Expession	Expression SEM																		Target	Sample	Cq	Mean Cq	Expession	Expression SEM			Target	Sample	Cq	Mean Cq	Expession	Expression SEM
	pri-miR-430a	wild type	19.65	19.67	1	0.05258																		pri-miR-430a	wild type	21.52	21.89	1	0.11213			pri-miR-430a	wild type	19.02	18.85	1	0.03196
			19.74																							22.11								18.87
			19.63																							22.04								18.65
		wild type + 5'FoxH1	19.94	19.91	0.79362	0.0443																			wild type + FHDΔEH1-GFP	19.62	19.93	6.60489	1.10617				wild type + FHDm768-GFP	18.68	18.85	1.06613	0.06606
			19.79																							20.35								18.91
			20																							19.83								18.97
		MZsur	18.17	18.05	2.00824	0.14585																			MZsur	21.01	20.82	1.93988	0.18238				MZsur	18.23	17.98	1.56729	0.17608
			18.09																							20.63								17.99
			17.9																							20.82								17.72
		MZsur + 5'FoxH1	18.52	18.12	1.71296	0.28932																			MZsur + FHDΔEH1-GFP	20.16	20.57	4.5183	0.6633				MZsur + FHDm768-GFP	18.29	18.16	1.69405	0.12011
			17.88																							20.85								18.08
			17.96																							20.72								18.12
	pri-miR-430b	wild type	19.87	19.75	1	0.11258																		pri-miR-430b	wild type	22.22	21.72	1	0.1468			pri-miR-430b	wild type	19.33	19.07	1	0.04613
			19.93																							21.52								19.32
			19.46																							21.41								18.57
		wild type + 5'FoxH1	20.07	19.91	0.83779	0.10542																			wild type + FHDΔEH1-GFP	19.28	19.77	6.55712	1.50249				wild type + FHDm768-GFP	19.25	19.18	0.99234	0.04443
			19.56																							20.35								18.97
			20.1																							19.69								19.32
		MZsur	18.46	18.32	1.7457	0.16652																			MZsur	20.73	20.61	1.99681	0.1551				MZsur	18.47	18.38	1.39562	0.08329
			18.36																							20.46								18.38
			18.14																							20.63								18.3
		MZsur + 5'FoxH1	18.61	18.28	1.64041	0.27235																			MZsur + FHDΔEH1-GFP	20.17	20.25	5.00629	0.66241				MZsur + FHDm768-GFP	18.56	18.31	1.79583	0.15903
			18.34																							20.62								18.26
			17.88																							19.98								18.1
	pri-miR-430c	wild type	20.24	19.98	1	0.10196																		pri-miR-430c	wild type	21.8	21.17	1	0.16472			pri-miR-430c	wild type	17.45	18.09	1	0.05623
			19.9																							20.89								18.65
			19.81																							20.81								18.16
		wild type + 5'FoxH1	20.03	20.16	0.82671	0.05824																			wild type + FHDΔEH1-GFP	19.16	19.5	5.42368	0.97127				wild type + FHDm768-GFP	18.18	18.02	1.12368	0.07516
			20.13																							19.95								18.12
			20.33																							19.4								17.76
		MZsur	17.75	17.72	3.00775	0.19002																			MZsur	20.38	20.23	1.78181	0.1665				MZsur	17.33	17.2	1.59516	0.11694
			17.78																							20.02								17.2
			17.62																							20.28								17.06
		MZsur + 5'FoxH1	18	17.75	2.63458	0.3042																			MZsur + FHDΔEH1-GFP	20.74	20.68	2.55291	0.08668				MZsur + FHDm768-GFP	17.25	17.24	1.90478	0.17828
			17.76																							20.59								17.04
			17.48																							20.71								17.42
	ef1a	wild type	16.16	16.13	N/A	N/A																		ef1a	wild type	20.34	20.23	N/A	N/A			ef1a	wild type	19.69	19.39	N/A	N/A
			16.23																							20.22								19.18
			16																							20.14								19.3
		wild type + 5'FoxH1	16.09	16.03	N/A	N/A																			wild type + FHDΔEH1-GFP	20.89	20.99	N/A	N/A				wild type + FHDm768-GFP	19.43	19.49	N/A	N/A
			16.08																							21.21								19.55
			15.93																							20.88								19.49
		MZsur	15.55	15.36	N/A	N/A																			MZsur	20.28	20.12	N/A	N/A				MZsur	19.05	19.18	N/A	N/A
			15.23																							20.02								19.2
			15.3																							20.06								19.29
		MZsur + 5'FoxH1	15.12	15.26	N/A	N/A																			MZsur + FHDΔEH1-GFP	21.07	21.09	N/A	N/A				MZsur + FHDm768-GFP	19.31	19.47	N/A	N/A
			15.09																							21.07								19.55
			15.58																							21.12								19.55
	All calculations were automatically made by the Bio-Rad CFX Manager 3.1 software using ef1a for sample normalisation

## Sheet: Fig. 3C
	Fig. 3C:
	Target	Sample	Cq	Mean Cq	Expession	Expression SEM
	pri-miR-430a	wild type	17.85	17.71	1	0.17715
			18.01
			17.28
		wild type + foxH1m768	17.03	17	1.9781	0.10896
			17.12
			16.86
		MZsur	15.12	15.83	3.1847	0.43786
			17.04
			15.32
		MZsur + foxH1m768	15.39	15.28	6.79625	0.10844
			15.22
			15.24
	pri-miR-430b	wild type	18.06	17.64	1	0.2084
			17.73
			17.14
		wild type + foxH1m768	16.55	16.61	2.47094	0.39517
			17.04
			16.25
		MZsur	15.25	15.87	2.9433	0.42165
			17.04
			15.31
		MZsur + foxH1m768	15.28	15.22	6.77901	0.20221
			14.99
			15.38
	pri-miR-430c	wild type	17.33	17.12	1	0.14194
			17.23
			16.81
		wild type + foxH1m768	16.3	16.34	2.08639	0.10947
			16.48
			16.23
		MZsur	14.84	15.28	3.0987	0.32295
			16.15
			14.84
		MZsur + foxH1m768	15.21	15.1	5.15091	0.20225
			14.77
			15.32
	ef1a	wild type	14.54	14.59	N/A	N/A
			14.84
			14.4
		wild type + foxH1m768	14.84	14.86	N/A	N/A
			14.84
			14.91
		MZsur	14.19	14.38	N/A	N/A
			14.25
			14.7
		MZsur + foxH1m768	14.83	14.93	N/A	N/A
			14.96
			15
	All calculations were automatically made by the Bio-Rad CFX Manager 3.1 software using ef1a for sample normalisation

## Sheet: Fig. 3D
	Fig. 3D:
	Target	Sample	Cq	Mean Cq	Expession	Expression SEM
	pri-miR-430a	wild type	20.08	20.13	1	0.04644
			20.21
			20.11
		wild type + SID-EN	20.38	20.35	0.681	0.02465
			20.41
			20.27
		MZoep	21.13	21.14	0.88126	0.04221
			21.07
			21.22
		MZoep + SID-EN	20.86	21.1	0.45955	0.05544
			21.29
			21.14
	pri-miR-430b	wild type + SID-EN	21.12	21.12	0.4627	0.02346
			21.24
			21.01
		MZoep + SID-EN	21.45	21.79	0.32996	0.04852
			22.04
			21.88
	pri-miR-430c	wild type + SID-EN	20.4	20.42	0.54886	0.01611
			20.48
			20.38
		MZoep + SID-EN	21.02	21.12	0.38184	0.055
			21.45
			20.89
	ef1a	wild type	18.75	18.68	N/A	N/A
			18.58
			18.72
		wild type + SID-EN	18.31	18.35	N/A	N/A
			18.34
			18.4
		MZoep	19.43	19.51	N/A	N/A
			19.61
			19.48
		MZoep + SID-EN	18.49	18.53	N/A	N/A
			18.34
			18.75
	All calculations were automatically made by the Bio-Rad CFX Manager 3.1 software using ef1a for sample normalisation

## Sheet: Fig. 5A
	Fig. 5A: cd82b
	Target	Sample	Cq	Mean Cq	Expession	Expression SEM
	cd82b	wild type	26.16	26.09	1	0.05062
			26.01
		MZsur	28.49	28.42	0.50714	0.02856
			28.34
		MZsur + foxH1WT	26.21	26.06	1.14123	0.13696
			25.9
		MZsur + FHD-VP16	26.64	26.58	0.63505	0.03472
			26.51
	ef1a	wild type	20.41	20.41	N/A	N/A
			20.4
		MZsur	21.78	21.76	N/A	N/A
			21.73
		MZsur + foxH1WT	20.65	20.57	N/A	N/A
			20.49
		MZsur + FHD-VP16	20.28	20.24	N/A	N/A
			20.19
	All calculations were automatically made by the Bio-Rad CFX Manager 3.1 software using ef1a for sample normalisation

## Sheet: Fig. 5B
	Fig. 5B: jade1
	Target	Sample	Cq	Mean Cq	Expession	Expression SEM
	jade 1	wild type	24.41	23.95	1	0.15177
			23.49
		MZsur	28.07	26.31	0.31404	0.13914
			24.55
		MZsur + foxH1WT	24.91	24.24	1.17941	0.07049
			23.57
		MZsur + FHD-VP16	26.08	25.26	0.37678	0.04625
			24.44
	ef1a	wild type	19.72	19.17	N/A	N/A
			18.62
		MZsur	21.07	19.85	N/A	N/A
			18.63
		MZsur + foxH1WT	20.37	19.69	N/A	N/A
			19.01
		MZsur + FHD-VP16	19.55	19.07	N/A	N/A
			18.59
	All calculations were automatically made by the Bio-Rad CFX Manager 3.1 software using ef1a for sample normalisation

[truncated: 3 more sheets: Fig. S1, Fig. S2A, Fig. S2B]
